# Supplementary material for: A Multi-Institutional Cohort of Therapy-Associated Polyposis in Childhood and Young Adulthood Cancer Survivors
Source: Oxford University Press journal article supplement (doi:10.1158/1940-6207.capr-19-0416), 2020-02-12
Supplement: 19406207capr190416-sup-228282_2_supp_6001308_q3p3jf.xlsx [file 19406207capr190416-sup-228282_2_supp_6001308_q3p3jf.xlsx]

## Sheet: Sheet1
Case number	Original cancer	Sex	Age of original cancer (years)	Chemotherapy (any)	Radiation above diaphragm	Radiation below diaphragm	Genes tested	Number of colonoscopies	Age of first colorecal polyp (years)	Total number of colorectal polyps	History of colorectal cancer	History of other neoplasia
1	Hodgkin lymphoma	Male	32	MOPP (mechlorethamine, vincristine, procarbazine, prednisone)	yes	no	APC, ATM, BARD1, BMPR1A, BRCA1, BRCA2, BRIP1, CDH1, CDK4, CDKN2A, CHEK2, EPCAM, GREM1, MLH1, MRE11A, MSH2, MSH6, MUTYH, NBN, NF1, PALB2, PMS2, POLD1, POLE, PTEN, RAD50, RAD51C, RAD51D, SMAD4, SMARCA4, STK11, TP53	6	59	118	no	no
2	Hodgkin lymphoma	Female	22	MOPP	yes	yes	APC, MUTYH, APC, ATM, AXIN2, BARD1, BMPR1A, BRCA1, BRCA2, BRIP1, CDH1, CDKN2A, CHEK2, DICER1, EPCAM, GREM1, KIT, MEN1, MLH1, MSH2, MSH6, MUTYH, NBN, NF1, PALB2, PDGFRA, PMS2, POLD1, POLE, PTEN, RAD50, RAD51C, RAD51D, SDHA, SDHB, SDHC, SDHD, SMAD4, SMARCA4, STK11, TP53, TSC1, TSC2, VHL	5	46	83	no	no
3	Hodgkin lymphoma	Male	44	yes (unknown regimen)	unknown	unknown	APC, MUTYH	4	60	81	no	no
4	Hodgkin lymphoma	Male	37	yes (unknown regimen)	yes	yes	APC, MUTYH	10	63	74	Stage I	no
5	Hodgkin lymphoma	Female	21	MOPP	yes	yes	APC, ATM, AXIN2, BARD1, BMPR1A, BRCA1, BRCA2, BRIP1, CDH1, CDKN2A, CHEK2, DICER1, EPCAM, GREM1, KIT, MEN1, MLH1, MSH2, MSH6, MUTYH, NBN, NF1, PALB2, PDGFRA, PMS2, POLD1, POLE, PTEN, RAD50, RAD51C, RAD51D, SDHA, SDHB, SDHC, SDHD, SMAD4, SMARCA4, STK11, TP53, TSC1, TSC2, VHL	14	47	72	no	Barrett's esophagus, breast cancer, desmoid tumor
6	Hodgkin lymphoma	Female	22	MOPP	no	no	APC, EPCAM, MLH1, MSH2, MSH6, MUTYH, PMS2	9	51	60	no	breast cancer
7	Hodgkin lymphoma	Male	24	BCVPP (bleomycin, cytoxan, vinblastine, procarbazine, prednisone), ABVD (doxorubicin, bleomycin, vinblastine, and dacarbazine)	yes	yes	APC, MUTYH	1	50	58	no	prostate cancer, squamous cell carcinoma of the skin
8	Hodgkin lymphoma	Male	30	yes (unknown regimen)	yes	yes	APC, MUTYH	13	53	54	no	lung cancer, prostate cancer
9	Neuroblastoma	Male	2.5	MADDOC protocol 88-048 x6 (cisplatin, cyclophophamide, adriamycin, nitrogen mustard, vincristine, dacarbazine), Auto SCT with VM26, melphalan, cisplatin)	yes	yes	ALK, APC, ATM, AXIN2, BAP1, BARD1, BLM, BMPR1A, BRCA1, BRCA2, BRIP1, CASR, CDC73, CDH1, CDK4, CDKN1B, CDKN1C, CDKN2A, CEBPA, CHEK2, DICER1, DIS3L2, EPCAM, EGFR, FH, FLCN, GATA2, GPC3, GREM1, HOXB13, HRAS, KIT, MAX, MEN1, MET, MITF, MLH1, MSH2, MSH6, MUTYH, NBN, NF1, NF2, PALB2, PDGFRA, PHOX2B, PMS2, POLD1, POLE, POT1, PRKAR1A, PTCH1, PTEN, RAD50, RAD51C, RAD51D, RB1, RECQL4, RET, RUNX1, SDHA, SDH…	5	31	53	Stage 0	papillary thyroid, schwannoma
10	Hodgkin lymphoma	Female	15	MOPP	yes	no	APC, MUTYH, PTEN	2	43	50	no	Barrett's esophagus, breast cancer, papillary thyroid
11	Hodgkin lymphoma	Female	16	MOPP	yes	yes	APC, MUTYH	3	51	50	no	no
12	Hodgkin lymphoma	Male	23	none	yes	yes	APC, ATM, AXIN2, BARD1, BMPR1A, BRCA1, BRCA2, BRIP1, CDH1, CDKN2A, CHEK2, DICER1, EPCAM, GREM1, KIT, MEN1, MLH1, MSH2, MSH6, MUTYH, NBN, NF1, PALB2, PDGFRA, PMS2, POLD1, POLE, PTEN RAD50, RAD51C, RAD51D, SDHA, SDHB, SDHC, SDHD, SMAD4, SMARCA4, STK11, TP53, TSC1, TSC2, VHL	4	54	50	no	thyroid cancer
13	Hodgkin lymphoma	Male	18	MOPP/ABVD	yes	yes	APC, MUTYH	5	33	40	no	Barrett's esophagus
14	Hodgkin lymphoma	Male	30	yes (unknown regimen)	unknown	unknown	Not tested	3	50	40	no	no
15	Hodgkin lymphoma	Female	23	MOPP	yes	no	APC, MUTYH	1	38	35	Stage IIIA	no
16	Hodgkin lymphoma	Male	22	MOPP	no	no	APC, BMPR1A, MUTYH, POLD1, POLE, PTEN, GREM1, SMAD4, STK11, TP53	2	55	34	no	no
17	Hodgkin lymphoma	Male	17	MOPP	yes	no	ALK, APC, ATM, AXIN2, BAP1, BARD1, BLM, BMPR1A, BRCA1, BRCA2, BRIP1, CASR, CDC73, CDH1, CDK4, CDKN1B, CDKN1C, CDKN2A, CEBPA, CHEK2, CTNNA1, DICER1, DIS3L2, EGFR, EPCAM, FH, FLCN, GATA2, GPC3, GREM1, HOXB13, HRAS, KIT, MAX, MEN1, MET, MITF, MLH1, MSH2, MSH3, MSH6, MUTYH, NBN, NF1, NF2, NTHL1, PALB2, PDGFRA, PHOX2B, PMS2, POLD1, POLE, POT1, PRKAR1A, PTCH1, PTEN, RAD50, RAD51C, RAD51D, RB1, RECQL4, …	1	50	33	no	no
18	Hodgkin lymphoma	Male	18	Cyclophosphamide, Doxorubicin, Prednisone, Procarbazine, Vincristine	yes	yes	APC, BMPR1A, EPCAM, MLH1, MSH2, MSH6, PMS2, MUTYH, POLD1, POLE, PTEN, GREM1, SMAD4, STK11, TP53	7	37	31	no	no
19	Neuroblastoma	Male	0.67	doxorubicin, vincristine, dacarbazine	yes	yes	APC, MUTYH	6	27	30	no	desmoid tumor, osteochondroma, meningioma, papillary thyroid
20	Non-Hodgkin's diffuse histocystic lymphoma	Male	25	yes (unknown regimen)	yes	yes	APC, GREM1, MUTYH, PMS2, PTCH1, PTEN, RAD50, RAD51C, RET, SMAD4, STK11, TP53, VHL	6	41	26	no	basal cell carcinoma, melanoma, schwannoma, squamous cell carcinoma
21	Medulloblastoma	Female	8	vincristine CCNU, cisplatin	yes	yes	APC, ATM, AXIN2, BAP1, BARD1, BMPR1A, BRCA1, BRCA2, BRIP1, CDH1, CDK4, CDKN2A, CHEK2, CTNNA1, DICER1, EPCAM, FH, FLCN, GREM1, HOXB13, KIT, MEN1, MLH1, MSH2, MSH3, MSH6, MUTYH, NBN, NF1, NTHL1, PALB2, PDGFRA, PMS2, POLD1, POLE, POT1, PTEN, RAD50, RAD51C, RAD51D, SDHA, SDHB, SDHC, SDHD, SMAD4, SMARCA4, STK11, TP53, TSC1, TSC2, VHL	2	29	26	no	no
22	Hodgkin lymphoma	Male	13	MOPP	yes	yes	APC, ATM, BAP1, BARD1, BRCA1, BRCA2, BRIP1, BMPR1A, CDH1, CDK4, CDKN2A, CHEK2, EPCAM, FH, FLCN, GREM1, MAX, MEN1, MET, MITF, MLH1, MRE11A, MSH2, MSH6, MUTYH, NBN, NF1, PALB2, PMS2, POLD1, POLE, PTEN, RAD50, RAD51C, RAD51D, RET, SDHA, SDHAF2, SDHB, SDHC, SDHD, SMAD4, SMARCA4, STK11, TMEM127, TP53, TSC1, TSC2, VHL	4	43	22	no	non-melanomatous skin cancer
23	Hodgkin lymphoma	Male	15	Vinblastine, Chlorambucil, Thiotepa, Procarbazine, Prednisone	yes	yes	APC, BMPR1A, BRCA1, BRCA1, MLH1, MUTYH, POLD1, POLE, PMS2, PTEN, GREM1, SMAD4, STK11, TP53	3	58	21	Stage 0	meningioma				S
24	Hodgkin lymphoma	Female	16	MOPP	yes	no	APC, ATM, AXIN2, BARD1, BMPR1A, BRCA1, BRCA2, BRIP1, CDH1, CDKN2A, CHEK2, DICER1, EPCAM, GREM1, KIT, MEN1, MLH1, MSH2, MSH6, MUTYH, NBN, NF1, PALB2, PDGFRA, PMS2, POLD1, POLE, PTEN, RAD50, RAD51C, RAD51D, SDHA, SDHB, SDHC, SDHD, SMAD4, SMARCA4, STK11, TP53, TSC1, TSC2, VHL	4	31	17	no	Barrett's esophagus
25	Hodgkin lymphoma	Female	6	6 cycles on a multi drug protocol	yes	yes	APC, CHEK2, EPCAM, FANCC, MEN1, MET, MLH1, MUTYH, MRE11A, MSH2, MSH6, MUTYH, NBN, NF1, PALB2	4	26	16	Stage unknown	no
26	Acute myeloid leukemia	Male	7	yes (unknown regimen)	yes	yes	APC, MUTYH	3	29	16	no	no
27	Neuroblastoma	Male	2	cyclophosphamide	yes	yes	APC, BMPR1A, CDH1, CHEK2, EPCAM, MLH1, MSH2, MSH6, MUTYH, PMS2, PTEN, SMAD4, STK11, TP53	5	29	16	Stage 0	basal cell carcinoma, papillary thyroid
28	Nephroblastoma	Female	2	yes (unknown regimen)	unknown	unknown	APC, ATM, AXIN2, BARD1, BMPR1A, BRCA1, BRCA2, BRIP1, CDH1, CDKN1C, CDKN2A, CHEK2, DICER1, EPCAM, GREM1, KIT, MEN1, MLH1, MSH2, MSH6, MUTYH, NBN, NF1, PALB2, PDGFRA, PMS2, POLD1, POLE, PTEN, RAD50, RAD51C, RAD51D, SDHA, SDHB, SDHC, SDHD, SMAD4, SMARCA4, STK11, TP53, TSC1, TSC2, VHL, WT1	5	45	14	Stage IIA	no
29	Hodgkin lymphoma	Male	16	MOPP, ABVD	no	no	APC, AXIN2, BAP1, BMPR1A, BRCA2, CDK4, CDKN2A, CHEK2, EPCAM, GREM1, MITF, MLH1, MSH2, MSH3, MSH6, MUTYH, NTHL1, PMS2, POLD1, POLE, POT1, PTEN, RB1, SMAD4, STK11, TP53	1	47	13	Stage 0	no
30	Hodgkin lymphoma	Female	29	none	yes	no	APC, ATM, AXIN2, BARD1, BMPR1A, BRCA1, BRCA2, BRIP1, CDH1, CDKN2A, CHEK2, DICER1, EPCAM, GREM1, KIT, MEN1, MLH1, MSH2, MSH6,MUTYH, NBN, NF1, PALB2, PDGFRA, PMS2, POLD1, POLE, PTEN, RAD50, RAD51C, RAD51D, SDHA, SDHB, SDHC, SDHD, SMAD4, SMARCA4, STK11, TP53, TSC1, TSC2, VHL	2	55	11	no	breast cancer
31	Hodgkin lymphoma	Male	13	none	yes	no	Unknown	1	52	11	no	thyroid cancer
32	Hodgkin lymphoma	Female	15	none	yes	yes	APC, MUTYH, APC, ATM, AXIN2, BARD1, BMPR1A, BRCA1, BRCA2, BRIP1, CDH1, CDKN2A, CHEK2, DICER1, EPCAM, GREM1, KIT, MEN1, MLH1, MSH2, MSH6, MUTYH, NBN, NF1, PALB2, PDGFRA, PMS2, POLD1, POLE, PTEN, RAD50, RAD51C, RAD51D, SDHA, SDHB, SDHC, SDHD, SMAD4, SMARCA4, STK11, TP53, TSC1, TSC2, VHL	6	56	10	Stage I	sebaceous adenoma of the cheek
33	Hodgkin lymphoma	Male	39	yes (unknown regimen)	yes	yes	APC, ATM, BARD1, BMPR1A, BRCA1, BRCA2, BRIP1, CDH1, CDK4, CDKN2A, CHEK2, EPCAM, MLH1, MSH2, MSH6, MUTYH, NBN, PALB2, PMS2, PTEN, RAD51c, RAD51d, SMAD4, STK11, TP53	3	55	10	Stage I	pancreatic cancer
34	Hodgkin lymphoma	Female	15	none	yes	yes	APC, BRCA1, BRCA2, EPCAM, FH, FLCN, MET, MITF, MLH1, MSH2, MSH6, MUTYH, PTEN, SDHA, SDHB, SDHC, SDHD, STK11, TP53, TSC1, TSC2, VHL	3	52	3	no	basal cell carcinoma, lobular breast cancer, renal cell carcinoma
